# Supplementary material for: Polydopamine-doped virus-like structured nanoparticles for photoacoustic imaging guided synergistic chemo-/photothermal therapy
Source: PubMed Central journal article supplement — RSC Adv. 2020 May 11;10(31):18016–24. doi: 10.1039/d0ra02915g (PMC9059141; doi:10.1039/d0ra02915g), 2020-05-11
Supplement: RA-010-D0RA02915G-s001.pdf [file RA-010-D0RA02915G-s001.pdf]

ARTICLE

# Polydopamine-doped virus-like structured nanoparticles for photoacoustic imaging guided synergistic chemo-/photothermal therapy

Received 00th January 20xx,  
Accepted 00th January 20xx

DOI: 10.1039/x0xx00000x

Rong Zhong,<sup>ab</sup> Ruoping Wang,<sup>ab</sup> Xuemei Hou,<sup>ab</sup> Liang Song,<sup>\*ab</sup> and Yun Zhang,<sup>\*abc</sup>

## Electronic supplementary information

Table S1 DLS size distribution and polydispersity index of GNR, GNR@HPMO, GNR@HPMO@PVMSN.

| GNR                        | GNR@HPMO                 | GNR@HPMO@PVMSN           |
|----------------------------|--------------------------|--------------------------|
| 60.42nm<br>(PDI:<br>0.236) | 127.14nm (P<br>DI:0.322) | 201.27nm (PDI:0.202<br>) |

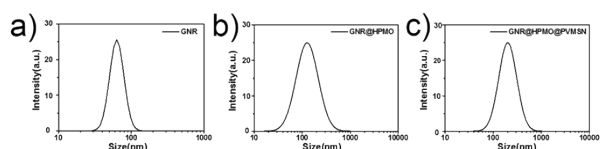

Fig S1 DLS diameters of GNR (a), GNR@HPMO (b), GNR@HPMO@PVMSN (c).

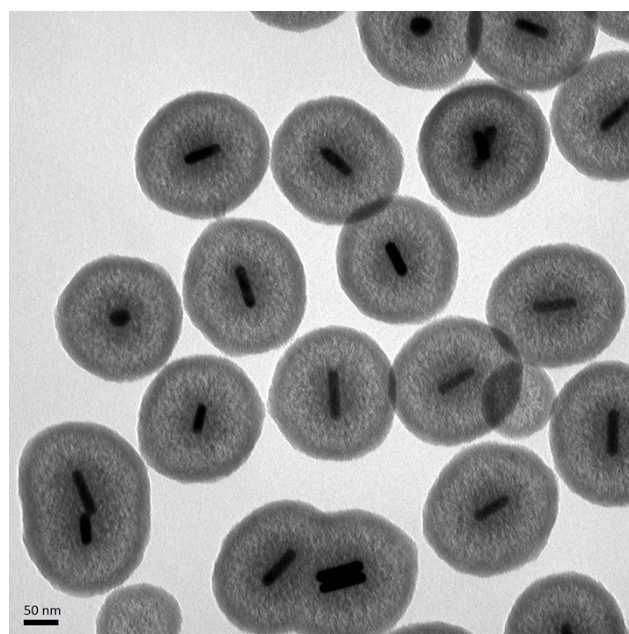

Fig. S2 TEM image of GNR@HPMO, the ethanol/water ratio is 0.39. Scale bar, 50 nm.

<sup>a</sup> CAS Key Laboratory of Design and Assembly of Functional Nanostructures, and Fujian Provincial Key Laboratory of Nanomaterials, Fujian Institute of Research on the Structure of Matter, Chinese Academy of Sciences, Fuzhou 350002, P. R. China. E-mail: songliang@fjirsm.ac.cn and zhangy@fjirsm.ac.cn

<sup>b</sup> Department of Translational Medicine, Xiamen Institute of Rare-earth Materials, Haixi Institutes, Chinese Academy of Sciences, Xiamen 361021, P. R. China.

<sup>c</sup> University of Chinese Academy of Sciences, Beijing 100049, P. R. China.

Electronic Supplementary Information (ESI) available: [details of any supplementary information available should be included here]. See DOI: 10.1039/x0xx00000x

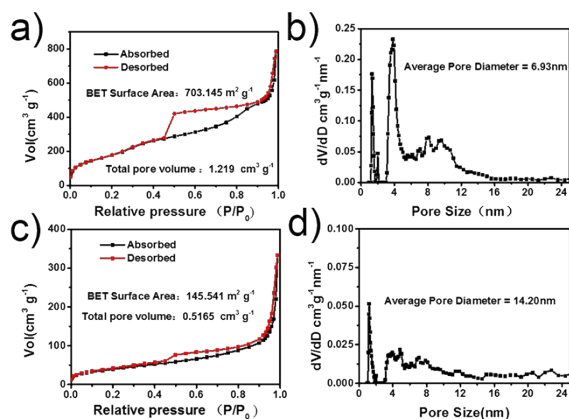

Fig. S3 Nitrogen adsorption-desorption isotherms and pore size distribution curves of GNR@HPMO (a-b) and GNR@HPMO@PVMSN (c-d).

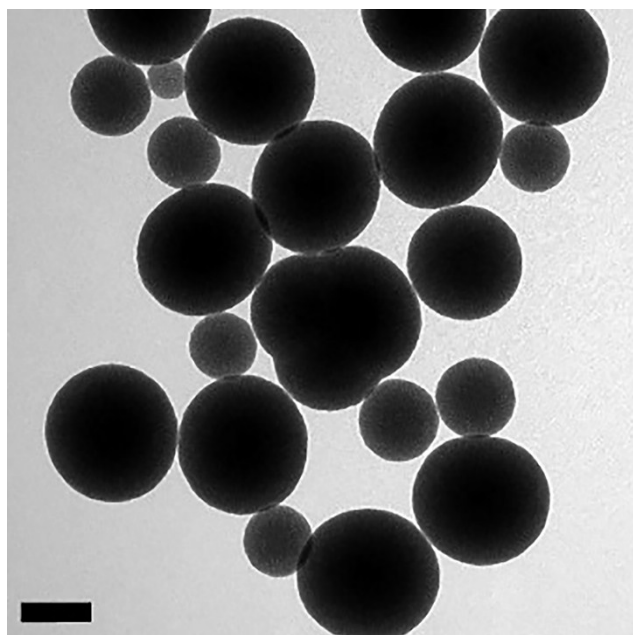

Fig. S4 TEM image of GNR@HPMO@VMSN, reaction without dopamine at the same reaction time of 17 h. Scale bar, 200 nm.

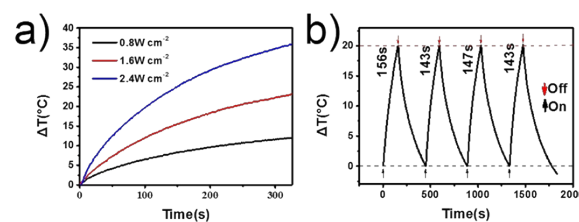

Fig. S5 (a) Temperature curves of GNR@HPMO@PVMSN aqueous solution under different power densities; (b) Temperature curves of GNR@HPMO@PVMSN aqueous solution through four cycles of 808 nm laser on/off.

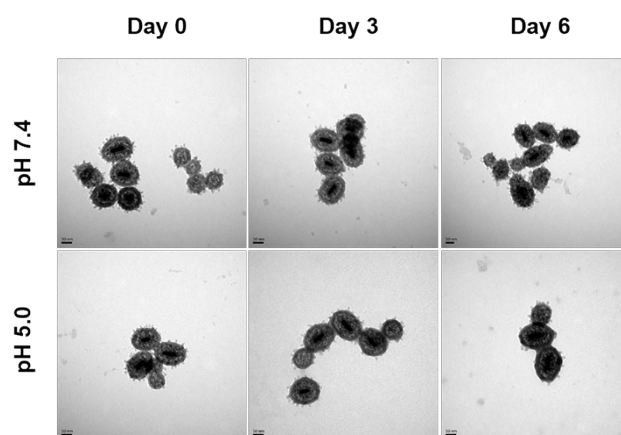

Fig. S6 TEM images of GNR@HPMO@PVMSN at pH 7.4 and 5.0 for 0, 3 and 6 day.

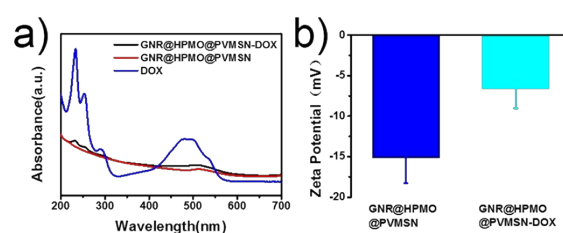

Fig. S7 (a) UV-Vis-NIR absorption spectra of DOX, GNR@HPMO@PVMSN and GNR@HPMO@PVMSN-DOX; (b) Zeta potential analysis for GNR@HPMO@PVMSN and GNR@HPMO@PVMSN-DOX.

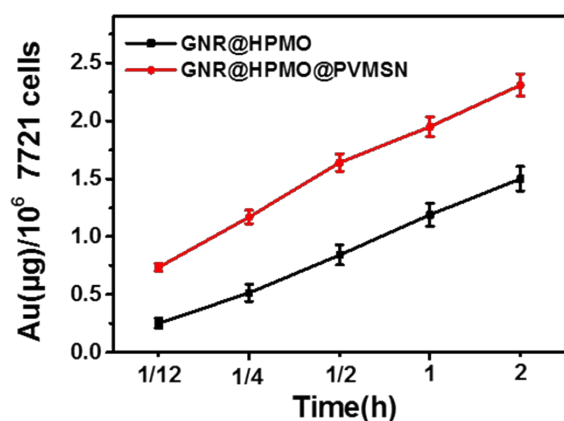

Fig. S8 Time-dependent quantitative analysis of the Au content in 7721 cells after incubation for 5, 15, 30 min, 1 and 2 h.

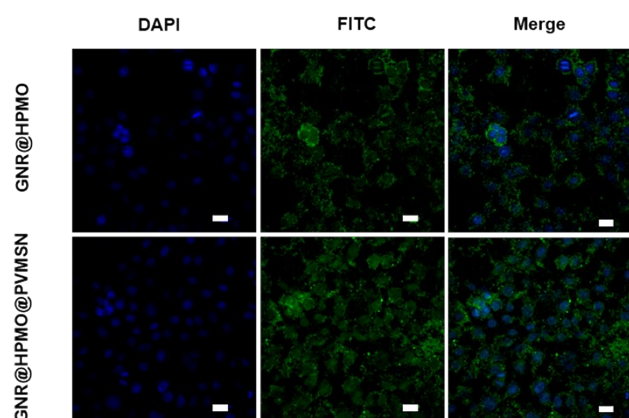

Fig. S9 CLSM images of the 7721 cells incubated with GNR@HPMO, and GNR@HPMO@PVMSN for 24 h by using DAPI as nuclear staining reagent and FITC as fluorescent labeling of materials. Scale bar, 20 μm.

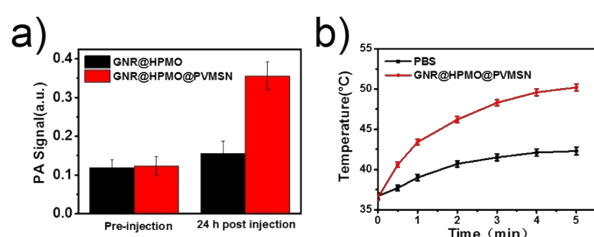

Fig. S10 (a) PA images of tumor-bearing mice before and after intravenous injection of GNR@HPMO@PVMSN and GNR@HPMO; (b) Time dependent temperature curves of tumor-bearing mice after intravenous injection with PBS or GNR@HPMO@PVMSN for 24h exposed to the 808 nm laser ( $0.8 \text{ W cm}^{-2}$ ) for 5 min.

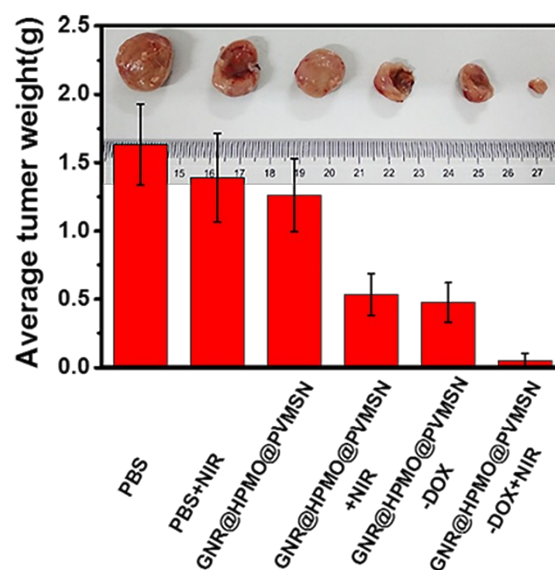

Fig. S11 Photographs and weights of excised tumors from representative euthanized mice after various treatments.

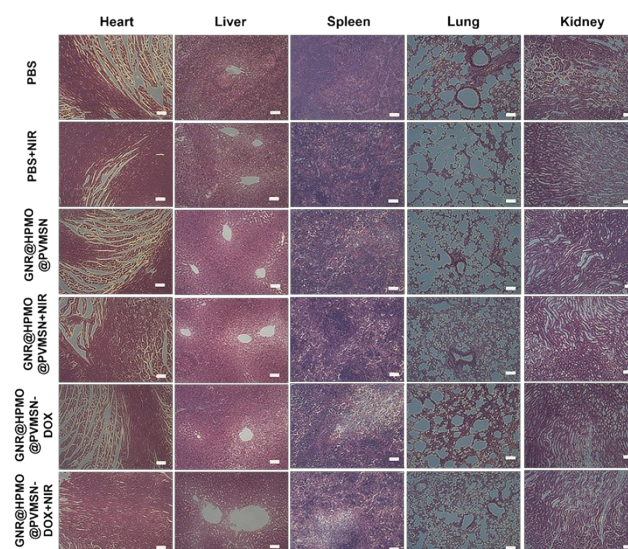

Fig. S12 Representative H&E stained images of major organs including the heart, liver, spleen, lung, and kidney collected from tumor-bearing mice after 16 days of therapy. Scale bar, 200 μm.
